# Supplementary material for: A novel extraction method for simultaneous determination of neonicotinoid insecticides and their metabolites in human urine
Source: Royal Society of Chemistry journal article supplement (doi:10.1039/c9ay00288j), 2019-01-01
Supplement: c9ay00288j1.pdf [file c9ay00288j1.pdf]

**Supplementary Information**

**A novel extraction method for simultaneous determination of  
neonicotinoid insecticides and their metabolites in human urine**

*(In entire manuscript, the red font represents the modification)*

Shiming Song<sup>1,2</sup>, Yuan He<sup>1</sup>, Bo Zhang<sup>1</sup>, Mingwei Gui<sup>1</sup>, Jiping Ouyang<sup>1</sup>, Tao Zhang<sup>1,2\*</sup>

<sup>1</sup> School of Environmental Science and Engineering, Sun Yat-Sen University,  
Guangzhou 510275, China

<sup>2</sup> Guangdong Provincial Key Laboratory of Environmental Pollution Control and  
Remediation Technology (Sun Yat-Sen University), Guangzhou 510275, China

\*Corresponding Author:

Tao Zhang

School of Environmental Science and Engineering, Sun Yat-Sen University

135 Xingang West Street, Guangzhou, 510275, China

Tel: 86-20-84113454

Email: zhangt47@mail.sysu.edu.cn

Submission to: Analytical Method

## 25 **Materials and Methods**

### 26 **Sample Preparation of QuEChERS Method**

27       Urine sample (3 mL) was transferred into a pp tube and 1 ng of mixed internal  
28 standard solution was spiked. Then 3 mL of 1% acetic acid in acetonitrile was added,  
29 and the mixture was shaken vigorously for 2 min. After the tube was centrifuged at  
30 5000 g for 5 min, the 1.5 mL of supernatant was transferred to a 2 mL of tube and mixed  
31 with 20 mg of purifying agents (PSA, C18, or GCB). The tube was shaken vigorously  
32 for 1 min and centrifuged at 5000 g for 5 min. Finally, the supernatant was placed into  
33 an LC vial to carry out analysis.

34

**Table S1** MRM transitions and other LC-MS/MS conditions.

| Pesticide          | t <sub>R</sub> (min) <sup>b</sup> | Ion transition       | Fragmentor (V) | Collision energy (eV) |
|--------------------|-----------------------------------|----------------------|----------------|-----------------------|
| ACE                | 6.4                               | 223→56               | 140            | 13                    |
|                    |                                   | 223→126 <sup>a</sup> | 140            | 17                    |
| IMI                | 6.1                               | 256→175              | 80             | 18                    |
|                    |                                   | 256→209 <sup>a</sup> | 80             | 10                    |
| CLO                | 5.9                               | 250→132              | 80             | 6                     |
|                    |                                   | 250→169 <sup>a</sup> | 80             | 12                    |
| THD                | 6.9                               | 253→186              | 140            | 10                    |
|                    |                                   | 253→126 <sup>a</sup> | 140            | 16                    |
| THM                | 5.6                               | 292→181              | 80             | 22                    |
|                    |                                   | 292→211 <sup>a</sup> | 80             | 6                     |
| DIN                | 4.8                               | 203→87               | 80             | 14                    |
|                    |                                   | 203→129 <sup>a</sup> | 80             | 8                     |
| DN                 | 8.9                               | 158→102              | 80             | 15                    |
|                    |                                   | 158→57 <sup>a</sup>  | 80             | 20                    |
| UF                 | 0.8                               | 159→67               | 80             | 16                    |
|                    |                                   | 159→85 <sup>a</sup>  | 80             | 14                    |
| 5-OH-IMI           | 6.2                               | 272→191              | 70             | 16                    |
|                    |                                   | 272→225 <sup>a</sup> | 70             | 10                    |
| N-dm-ACE           | 1.6                               | 209→90               | 70             | 12                    |
|                    |                                   | 209→126 <sup>a</sup> | 70             | 26                    |
| ACE-d <sub>3</sub> | 6.4                               | 226→59               | 80             | 16                    |
|                    |                                   | 226→126 <sup>a</sup> | 80             | 18                    |
| IMI-d <sub>4</sub> | 6.1                               | 260→179              | 120            | 14                    |
|                    |                                   | 260→213 <sup>a</sup> | 120            | 10                    |
| CLO-d <sub>3</sub> | 5.9                               | 253→172              | 80             | 10                    |
|                    |                                   | 253→132 <sup>a</sup> | 80             | 10                    |
| THD-d <sub>4</sub> | 6.9                               | 257→190              | 80             | 14                    |
|                    |                                   | 257→126 <sup>a</sup> | 80             | 19                    |
| THM-d <sub>3</sub> | 5.6                               | 295→184              | 80             | 20                    |
|                    |                                   | 295→214 <sup>a</sup> | 80             | 10                    |

<sup>a</sup> Transitions used for quantification ion; <sup>b</sup> Retention time

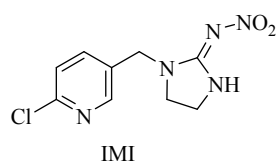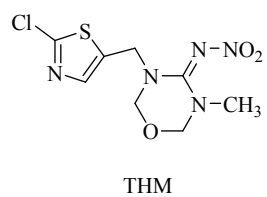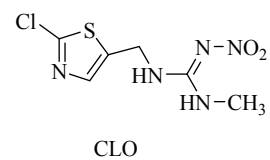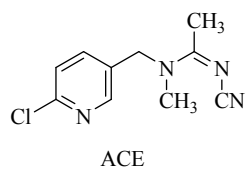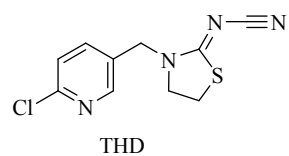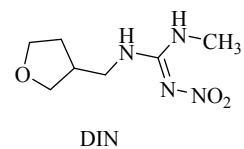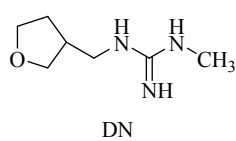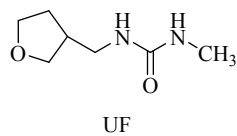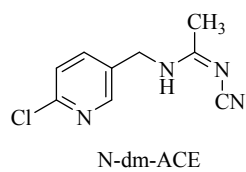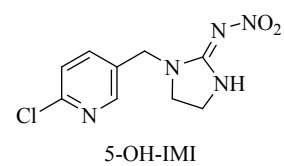

**Figure S1** Chemical structure of NEOs and their metabolites.

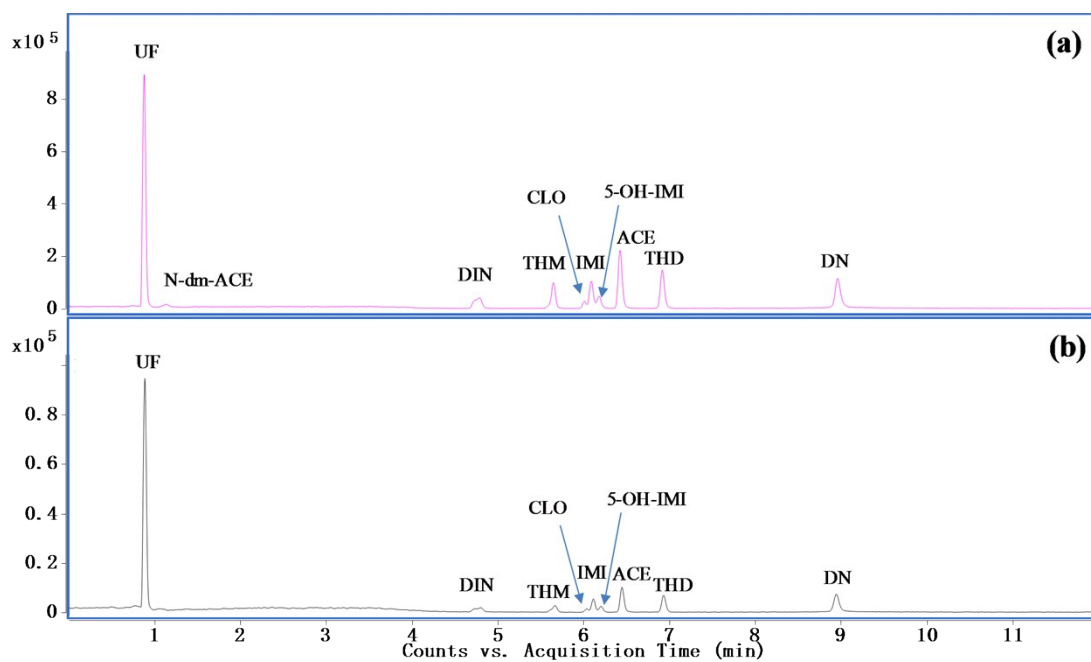

40

41 **Figure S2** LC-MS/MS chromatography in MRM acquisition mode of NEOs and their  
 42 metabolites (100 ng/mL) testing difference mobile phase: ultrapure water/acetonitrile  
 43 (a) and ultrapure water/methanol (b)

44

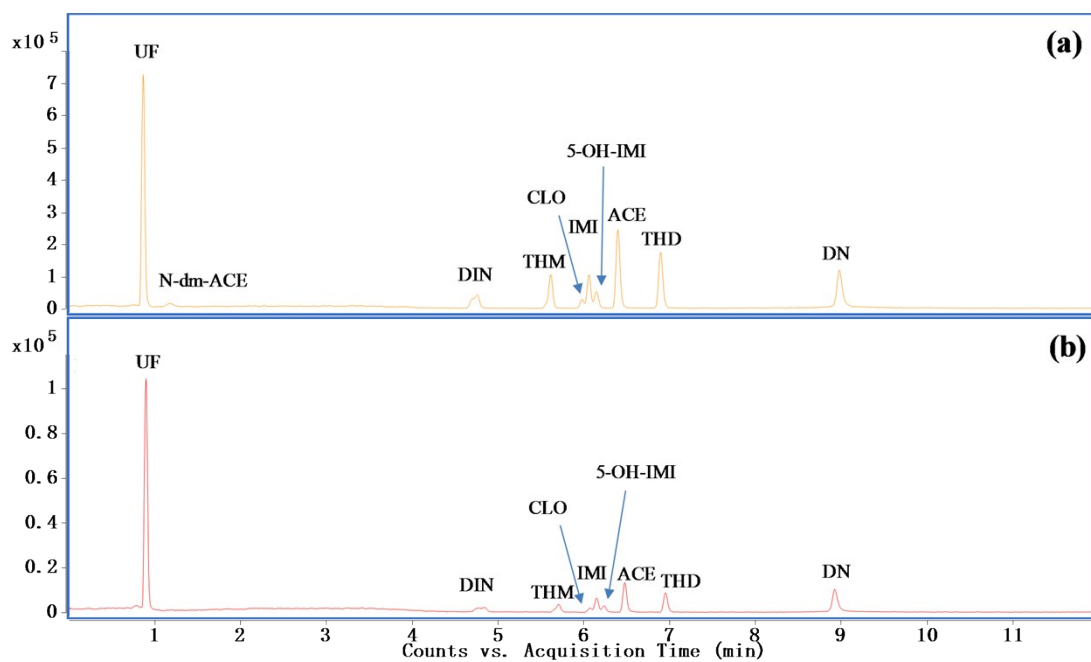

45

46 **Figure S3** LC-MS/MS chromatography in MRM acquisition mode of NEOs and their  
 47 metabolites (100 ng/mL) testing difference mobile phase: 0.1% formic acid in ultrapure  
 48 water/acetonitrile (a) and 5 mM ammonium acetate in ultrapure water /methanol (b).

49
